# Supplementary material for: Chelatoaromaticity—existing: yes or no? An answer given by spatial magnetic properties (through space NMR shieldings—TSNMRS)
Source: Royal Society of Chemistry journal article supplement (doi:10.1039/c1cp21942a), 2011-01-01

# **Chelatoaromaticity – Existing: Yes or No? An Answer Given by Spatial Magnetic Properties (Through Space NMR Shieldings – TSNMRS) †**

**Erich Kleinpeter\* and Andreas Koch**

*Universität Potsdam, Institut für Chemie, Karl-Liebknecht-Str. 24-25, D-14476  
Potsdam(Golm), Germany*

Corresponding author: Erich Kleinpeter, Phone +49-331-977-5210; Fax: +49-331-977-5064;  
E-mail: ekleinp@uni-potsdam.de

## **Supporting Information**

Coordinates and absolute energies (a.u.) at the B3LYP/6-311G\*\* level of theory of all studied compounds **4–14**, and visualization of the TSNMRSs of the acetyl acetonato complexes **5b,c** and **6**.

2

Total energies in a.u. and Cartesian coordinates in Å

4

E = -694.9848763 a.u.

|    |   |           |           |           |
|----|---|-----------|-----------|-----------|
| 1  | 6 | 0.234249  | 0.001237  | -0.022790 |
| 2  | 6 | 0.946236  | 1.216997  | 0.026500  |
| 3  | 6 | 2.342635  | 1.195309  | 0.021297  |
| 4  | 6 | 3.061497  | 0.001100  | -0.030477 |
| 5  | 6 | 2.342287  | -1.192612 | -0.088280 |
| 6  | 6 | 0.945773  | -1.214241 | -0.084761 |
| 7  | 6 | -1.264179 | 0.000434  | 0.002838  |
| 8  | 6 | 0.224575  | 2.544637  | 0.066183  |
| 9  | 1 | 2.882193  | 2.137434  | 0.056881  |
| 10 | 6 | 4.570957  | -0.000332 | 0.000942  |
| 11 | 1 | 2.881512  | -2.134114 | -0.139034 |
| 12 | 6 | 0.223351  | -2.539980 | -0.165500 |
| 13 | 6 | -2.007845 | 0.053241  | -1.159020 |
| 14 | 8 | -3.331778 | 0.053475  | -1.155395 |
| 15 | 6 | -1.976718 | -0.058205 | 1.272430  |
| 16 | 8 | -3.221869 | -0.061103 | 1.330676  |
| 17 | 6 | -1.195015 | -0.117646 | 2.566231  |
| 18 | 6 | -1.431777 | 0.115893  | -2.539079 |
| 19 | 1 | -3.603151 | 0.010231  | -0.185237 |
| 20 | 1 | -0.352687 | 2.715848  | -0.847486 |
| 21 | 1 | 0.933174  | 3.367990  | 0.172784  |
| 22 | 1 | -0.484620 | 2.600667  | 0.896891  |
| 23 | 1 | 4.941596  | -0.040281 | 1.031129  |
| 24 | 1 | 4.981101  | 0.902458  | -0.457878 |
| 25 | 1 | 4.980699  | -0.864832 | -0.526674 |
| 26 | 1 | 0.932432  | -3.369458 | -0.142442 |
| 27 | 1 | -0.360756 | -2.624305 | -1.086830 |
| 28 | 1 | -0.479959 | -2.675221 | 0.661108  |
| 29 | 1 | -0.545785 | 0.755570  | 2.672165  |
| 30 | 1 | -0.542316 | -0.994552 | 2.588453  |
| 31 | 1 | -1.896789 | -0.158781 | 3.397836  |
| 32 | 1 | -1.796278 | -0.735772 | -3.120902 |
| 33 | 1 | -0.344182 | 0.113990  | -2.532740 |
| 34 | 1 | -1.793164 | 1.019148  | -3.039362 |

3

5a

E = -701.9953259 a.u.

|    |   |           |           |           |
|----|---|-----------|-----------|-----------|
| 1  | 6 | 0.276401  | -0.010217 | -0.000711 |
| 2  | 6 | 0.990742  | -0.004044 | 1.214621  |
| 3  | 6 | 2.387738  | 0.003582  | 1.195569  |
| 4  | 6 | 3.108428  | 0.001192  | 0.001804  |
| 5  | 6 | 2.389858  | -0.008438 | -1.193769 |
| 6  | 6 | 0.993370  | -0.016337 | -1.215165 |
| 7  | 6 | -1.228105 | 0.001439  | -0.002269 |
| 8  | 6 | 0.268429  | -0.019571 | 2.542568  |
| 9  | 1 | 2.926353  | 0.012085  | 2.139092  |
| 10 | 6 | 4.618550  | -0.021402 | 0.002445  |
| 11 | 1 | 2.930225  | -0.009624 | -2.136379 |
| 12 | 6 | 0.272486  | -0.041834 | -2.543604 |
| 13 | 6 | -1.888952 | 1.266293  | -0.008363 |
| 14 | 8 | -3.146154 | 1.436580  | -0.005522 |
| 15 | 6 | -1.943911 | -1.227136 | 0.004607  |
| 16 | 8 | -3.211022 | -1.335967 | 0.006596  |
| 17 | 6 | -1.200735 | -2.551010 | 0.010033  |
| 18 | 6 | -1.053216 | 2.536288  | -0.013199 |
| 19 | 3 | -4.260606 | 0.071219  | 0.003234  |
| 20 | 1 | -0.431439 | 0.815459  | 2.636941  |
| 21 | 1 | 0.977474  | 0.037621  | 3.371024  |
| 22 | 1 | -0.320506 | -0.933410 | 2.666768  |
| 23 | 1 | 4.997585  | -1.048985 | -0.031397 |
| 24 | 1 | 5.024075  | 0.446196  | 0.902795  |
| 25 | 1 | 5.025903  | 0.504023  | -0.864857 |
| 26 | 1 | 0.983028  | -0.004920 | -3.371932 |
| 27 | 1 | -0.416455 | 0.801006  | -2.650211 |
| 28 | 1 | -0.328306 | -0.949403 | -2.655588 |
| 29 | 1 | -1.509747 | -3.117278 | 0.893541  |
| 30 | 1 | -0.117309 | -2.455791 | 0.002765  |
| 31 | 1 | -1.521256 | -3.130611 | -0.860526 |
| 32 | 1 | -1.723052 | 3.392263  | -0.085578 |
| 33 | 1 | -0.343977 | 2.550870  | -0.843973 |
| 34 | 1 | -0.459876 | 2.619097  | 0.901837  |

4

5b

E = -856.7426342 a.u.

|    |    |           |           |           |
|----|----|-----------|-----------|-----------|
| 1  | 6  | 0.560413  | -0.000603 | 0.002106  |
| 2  | 6  | 1.276559  | 0.000342  | -1.212813 |
| 3  | 6  | 2.673720  | -0.004955 | -1.195734 |
| 4  | 6  | 3.395924  | -0.009018 | -0.003018 |
| 5  | 6  | 2.678137  | -0.013173 | 1.192854  |
| 6  | 6  | 1.281436  | -0.008008 | 1.214829  |
| 7  | 6  | -0.945083 | 0.001333  | 0.004630  |
| 8  | 6  | 0.554839  | 0.003349  | -2.541458 |
| 9  | 1  | 3.211541  | -0.007880 | -2.139986 |
| 10 | 6  | 4.906129  | 0.019152  | -0.005345 |
| 11 | 1  | 3.219428  | -0.022584 | 2.135103  |
| 12 | 6  | 0.563130  | -0.014276 | 2.545052  |
| 13 | 6  | -1.618497 | -1.257116 | -0.001525 |
| 14 | 8  | -2.869052 | -1.436354 | -0.009099 |
| 15 | 6  | -1.614755 | 1.261759  | 0.007208  |
| 16 | 8  | -2.864758 | 1.444865  | 0.001252  |
| 17 | 6  | -0.766284 | 2.531712  | 0.012074  |
| 18 | 6  | -0.773944 | -2.529680 | -0.005253 |
| 19 | 11 | -4.417723 | 0.006571  | -0.012658 |
| 20 | 1  | -0.093691 | -0.870541 | -2.652316 |
| 21 | 1  | 1.266648  | 0.002739  | -3.369889 |
| 22 | 1  | -0.089202 | 0.880870  | -2.649979 |
| 23 | 1  | 5.282245  | 1.048238  | 0.017829  |
| 24 | 1  | 5.312660  | -0.455914 | -0.901549 |
| 25 | 1  | 5.316367  | -0.496535 | 0.866529  |
| 26 | 1  | 1.276715  | -0.019530 | 3.371937  |
| 27 | 1  | -0.084546 | -0.889526 | 2.651145  |
| 28 | 1  | -0.081871 | 0.861814  | 2.660073  |
| 29 | 1  | -0.179734 | 2.619055  | -0.907220 |
| 30 | 1  | -0.051336 | 2.543854  | 0.838174  |
| 31 | 1  | -1.434071 | 3.389051  | 0.092114  |
| 32 | 1  | -1.444348 | -3.385420 | 0.069815  |
| 33 | 1  | -0.058377 | -2.549386 | 0.820140  |
| 34 | 1  | -0.188360 | -2.613108 | -0.925519 |

5

5c

E = -1294.3821331 a.u.

|    |    |           |           |           |
|----|----|-----------|-----------|-----------|
| 1  | 6  | -0.880996 | -0.000906 | 0.001233  |
| 2  | 6  | -1.602663 | -0.022213 | 1.213577  |
| 3  | 6  | -2.999556 | -0.026897 | 1.192556  |
| 4  | 6  | -3.718174 | -0.009011 | -0.002502 |
| 5  | 6  | -2.996470 | 0.008591  | -1.195487 |
| 6  | 6  | -1.599358 | 0.014086  | -1.212852 |
| 7  | 6  | 0.623576  | 0.000534  | 0.003124  |
| 8  | 6  | -0.884192 | -0.041567 | 2.543603  |
| 9  | 1  | -3.540370 | -0.047188 | 2.135017  |
| 10 | 6  | -5.228489 | 0.019523  | -0.004008 |
| 11 | 1  | -3.534778 | 0.016592  | -2.139568 |
| 12 | 6  | -0.878113 | 0.030455  | -2.541543 |
| 13 | 6  | 1.303588  | -1.254572 | -0.015702 |
| 14 | 8  | 2.552143  | -1.421750 | -0.016904 |
| 15 | 6  | 1.301400  | 1.256757  | 0.020903  |
| 16 | 8  | 2.549692  | 1.425991  | 0.017760  |
| 17 | 6  | 0.457144  | 2.532065  | 0.038963  |
| 18 | 6  | 0.461020  | -2.531060 | -0.034830 |
| 19 | 19 | 4.506154  | 0.004004  | -0.001876 |
| 20 | 1  | -0.229841 | -0.913060 | 2.637320  |
| 21 | 1  | -1.597689 | -0.062772 | 3.370525  |
| 22 | 1  | -0.245471 | 0.837638  | 2.669549  |
| 23 | 1  | -5.604895 | 1.048688  | 0.013618  |
| 24 | 1  | -5.638255 | -0.491529 | 0.870843  |
| 25 | 1  | -5.635814 | -0.460424 | -0.897396 |
| 26 | 1  | -1.590099 | 0.041652  | -3.369964 |
| 27 | 1  | -0.232120 | -0.844157 | -2.661586 |
| 28 | 1  | -0.230824 | 0.906797  | -2.639011 |
| 29 | 1  | 1.129219  | 3.385435  | 0.128487  |
| 30 | 1  | -0.258227 | 2.540005  | 0.865046  |
| 31 | 1  | -0.128612 | 2.633096  | -0.879654 |
| 32 | 1  | 1.136806  | -3.385895 | -0.056570 |
| 33 | 1  | -0.199152 | -2.567758 | -0.905652 |
| 34 | 1  | -0.183786 | -2.601839 | 0.845575  |

6

6

E = -919.1692956 a.u.

|    |   |           |           |           |
|----|---|-----------|-----------|-----------|
| 1  | 6 | 0.985800  | -0.030944 | -0.001472 |
| 2  | 6 | 1.621956  | 1.225983  | -0.012817 |
| 3  | 6 | 3.017481  | 1.281908  | -0.017497 |
| 4  | 6 | 3.802548  | 0.129144  | -0.009602 |
| 5  | 6 | 3.153587  | -1.106281 | -0.002079 |
| 6  | 6 | 1.761296  | -1.208130 | 0.003334  |
| 7  | 6 | -0.510885 | -0.105356 | 0.000732  |
| 8  | 6 | 0.823563  | 2.509669  | -0.023020 |
| 9  | 1 | 3.502543  | 2.253286  | -0.029615 |
| 10 | 6 | 5.309456  | 0.214285  | 0.017779  |
| 11 | 1 | 3.745884  | -2.016428 | -0.002056 |
| 12 | 6 | 1.113844  | -2.573918 | 0.011030  |
| 13 | 6 | -1.245936 | -0.187950 | -1.194389 |
| 14 | 8 | -2.534510 | -0.212527 | -1.216279 |
| 15 | 6 | -1.242711 | -0.169249 | 1.198965  |
| 16 | 8 | -2.531192 | -0.192992 | 1.224756  |
| 17 | 6 | -0.604973 | -0.237790 | 2.552010  |
| 18 | 6 | -0.611958 | -0.277075 | -2.548009 |
| 19 | 5 | -3.374030 | 0.108775  | 0.002856  |
| 20 | 9 | -4.469137 | -0.698580 | 0.010953  |
| 21 | 9 | -3.642285 | 1.455612  | -0.007631 |
| 22 | 1 | 0.167509  | 2.575244  | -0.895663 |
| 23 | 1 | 1.486054  | 3.376572  | -0.036833 |
| 24 | 1 | 0.178695  | 2.595160  | 0.856334  |
| 25 | 1 | 5.682980  | 0.200526  | 1.047519  |
| 26 | 1 | 5.665232  | 1.136580  | -0.446604 |
| 27 | 1 | 5.766575  | -0.628552 | -0.505771 |
| 28 | 1 | 1.869933  | -3.360665 | 0.011713  |
| 29 | 1 | 0.473856  | -2.727066 | -0.862999 |
| 30 | 1 | 0.480553  | -2.719443 | 0.891270  |
| 31 | 1 | 0.467644  | -0.407999 | 2.503149  |
| 32 | 1 | -1.092420 | -1.023030 | 3.133938  |
| 33 | 1 | -0.792881 | 0.706247  | 3.073842  |
| 34 | 1 | -0.805718 | 0.656988  | -3.085345 |
| 35 | 1 | -1.097803 | -1.074272 | -3.114890 |
| 36 | 1 | 0.461521  | -0.441949 | -2.499779 |

7

7a

E = -5028.745193 a.u.

|    |    |           |           |           |
|----|----|-----------|-----------|-----------|
| 1  | 77 | 0.092901  | 0.104353  | -0.083713 |
| 2  | 6  | 1.841021  | -0.942692 | -0.107367 |
| 3  | 6  | 3.172232  | -0.514668 | -0.182612 |
| 4  | 6  | 3.531498  | 0.882425  | -0.323497 |
| 5  | 6  | 2.609342  | 1.939064  | -0.412306 |
| 6  | 6  | 1.174534  | 1.731644  | -0.342431 |
| 7  | 15 | -0.398198 | -0.846107 | 2.085877  |
| 8  | 6  | 4.337213  | -1.526542 | -0.137125 |
| 9  | 1  | 4.600428  | 1.124226  | -0.380239 |
| 10 | 6  | 3.135755  | 3.376737  | -0.602509 |
| 11 | 1  | 0.661654  | 2.713409  | -0.431093 |
| 12 | 15 | -0.823753 | -1.684675 | -1.492818 |
| 13 | 15 | -1.859417 | 1.630404  | -0.197795 |
| 14 | 1  | 1.756192  | -2.044637 | -0.014030 |
| 15 | 6  | 0.448999  | 0.211709  | 3.429163  |
| 16 | 6  | 0.287749  | -2.567839 | 2.559766  |
| 17 | 6  | -2.155989 | -0.993847 | 2.840472  |
| 18 | 1  | 5.001172  | -1.343441 | 0.730310  |
| 19 | 1  | 4.969184  | -1.462085 | -1.044024 |
| 20 | 1  | 3.963437  | -2.562762 | -0.061034 |
| 21 | 1  | 4.238658  | 3.401724  | -0.650172 |
| 22 | 1  | 2.820309  | 4.037720  | 0.228114  |
| 23 | 1  | 2.749485  | 3.826563  | -1.537556 |
| 24 | 6  | -2.637397 | -1.715970 | -2.103235 |
| 25 | 6  | -0.632881 | -3.538391 | -1.037765 |
| 26 | 6  | 0.084114  | -1.666477 | -3.170540 |
| 27 | 6  | -1.822487 | 3.045359  | 1.085533  |
| 28 | 6  | -3.685702 | 1.091890  | -0.009210 |
| 29 | 6  | -1.991557 | 2.634665  | -1.816148 |
| 30 | 1  | 0.313593  | -0.224057 | 4.434856  |
| 31 | 1  | 0.029665  | 1.228649  | 3.399677  |
| 32 | 1  | 1.517757  | 0.272652  | 3.179014  |
| 33 | 1  | 0.119538  | -2.761659 | 3.633127  |
| 34 | 1  | 1.365394  | -2.587785 | 2.343272  |
| 35 | 1  | -0.211165 | -3.347371 | 1.964692  |
| 36 | 1  | -2.106319 | -1.424984 | 3.855354  |
| 37 | 1  | -2.778170 | -1.638324 | 2.199522  |
| 38 | 1  | -2.617253 | 0.004557  | 2.898518  |
| 39 | 1  | -2.874525 | -0.753806 | -2.583093 |
| 40 | 1  | -3.316466 | -1.868867 | -1.249796 |
| 41 | 1  | -2.783999 | -2.528409 | -2.835288 |
| 42 | 1  | 0.401371  | -3.728552 | -0.714885 |
| 43 | 1  | -0.867033 | -4.178476 | -1.905634 |
| 44 | 1  | -1.318920 | -3.782429 | -0.210818 |
| 45 | 1  | -0.070458 | -0.682508 | -3.637891 |
| 46 | 1  | 1.159302  | -1.782642 | -2.971801 |
| 47 | 1  | -0.275375 | -2.468201 | -3.840000 |
| 48 | 1  | -2.603545 | 3.795740  | 0.875123  |
| 49 | 1  | -0.831245 | 3.520435  | 1.061176  |
| 50 | 1  | -1.982230 | 2.622417  | 2.090312  |
| 51 | 1  | -4.340384 | 1.978118  | 0.041319  |
| 52 | 1  | -3.805645 | 0.498891  | 0.909082  |
| 53 | 1  | -3.984050 | 0.474391  | -0.868533 |
| 54 | 1  | -2.805433 | 3.378505  | -1.766728 |
| 55 | 1  | -2.174425 | 1.939504  | -2.650645 |
| 56 | 1  | -1.032017 | 3.141549  | -1.994401 |

8

8

E = -1891.9951756 a.u.

|    |    |           |           |           |
|----|----|-----------|-----------|-----------|
| 1  | 44 | -1.220936 | -0.000065 | 0.000035  |
| 2  | 7  | 0.382506  | 1.349202  | -0.040434 |
| 3  | 6  | 1.660673  | 0.727166  | -0.059182 |
| 4  | 6  | 2.911295  | 1.414814  | -0.143690 |
| 5  | 6  | 1.660687  | -0.727162 | 0.059377  |
| 6  | 7  | 0.382536  | -1.349193 | 0.040828  |
| 7  | 7  | -0.917144 | 0.266179  | 2.162471  |
| 8  | 6  | 4.150304  | 0.707350  | -0.078368 |
| 9  | 7  | -0.916832 | -0.266049 | -2.162321 |
| 10 | 6  | 4.150317  | -0.707346 | 0.078167  |
| 11 | 7  | -2.726449 | 1.701659  | -0.131236 |
| 12 | 7  | -2.726597 | -1.701539 | 0.130770  |
| 13 | 6  | 2.911324  | -1.414814 | 0.143685  |
| 14 | 1  | 0.406932  | 2.331514  | -0.348751 |
| 15 | 1  | 2.909729  | 2.507480  | -0.240264 |
| 16 | 1  | 0.407005  | -2.331571 | 0.348928  |
| 17 | 1  | -1.650741 | 0.529132  | 2.830042  |
| 18 | 1  | -0.236266 | 1.033661  | 2.000797  |
| 19 | 1  | -0.420731 | -0.578043 | 2.475749  |
| 20 | 1  | 5.094096  | 1.258445  | -0.140104 |
| 21 | 1  | -1.650358 | -0.529161 | -2.829932 |
| 22 | 1  | -0.420631 | 0.578296  | -2.475616 |
| 23 | 1  | -0.235748 | -1.033390 | -2.000871 |
| 24 | 1  | 5.094122  | -1.258438 | 0.139742  |
| 25 | 1  | -3.195627 | 1.737963  | -1.041484 |
| 26 | 1  | -2.127533 | 2.527113  | -0.016980 |
| 27 | 1  | -3.426224 | 1.675891  | 0.618021  |
| 28 | 1  | -3.198143 | -1.736760 | 1.039844  |
| 29 | 1  | -3.424444 | -1.676292 | -0.620299 |
| 30 | 1  | -2.127756 | -2.527377 | 0.018900  |
| 31 | 1  | 2.909775  | -2.507480 | 0.240258  |



9

9

E = -2659.1807544 a.u.

|    |    |           |           |           |
|----|----|-----------|-----------|-----------|
| 1  | 44 | -0.000058 | 0.006664  | -0.005428 |
| 2  | 7  | 0.023603  | 2.065476  | 0.036680  |
| 3  | 6  | -0.004576 | 2.702959  | -1.201277 |
| 4  | 6  | -0.020143 | 4.119955  | -1.425893 |
| 5  | 6  | 0.004084  | 1.796926  | -2.349587 |
| 6  | 7  | -0.024154 | 0.444603  | -2.017600 |
| 7  | 7  | 2.071950  | -0.162934 | -0.062054 |
| 8  | 6  | -0.013587 | 4.638611  | -2.748585 |
| 9  | 7  | -2.072020 | 0.021821  | 0.172994  |
| 10 | 6  | 0.013238  | 3.752109  | -3.872149 |
| 11 | 7  | -0.251780 | -0.128041 | 2.081953  |
| 12 | 7  | 0.251973  | -2.054864 | -0.359360 |
| 13 | 6  | 0.019725  | 2.345040  | -3.675439 |
| 14 | 1  | -0.109646 | 2.665468  | 0.857479  |
| 15 | 1  | -0.034525 | 4.797902  | -0.565753 |
| 16 | 6  | -2.580250 | 0.098451  | 1.473649  |
| 17 | 6  | -3.990841 | 0.161794  | 1.705207  |
| 18 | 6  | -4.881030 | 0.179240  | 0.611847  |
| 19 | 1  | -0.027174 | 5.721054  | -2.906107 |
| 20 | 6  | -4.346013 | 0.140588  | -0.715682 |
| 21 | 6  | -2.947432 | 0.059304  | -0.885482 |
| 22 | 6  | -1.564091 | 0.056928  | 2.534875  |
| 23 | 1  | 0.026897  | 4.157126  | -4.888246 |
| 24 | 6  | -1.850869 | 0.149514  | 3.934205  |
| 25 | 6  | -0.810267 | 0.018949  | 4.876176  |
| 26 | 6  | 0.522199  | -0.212702 | 4.404863  |
| 27 | 6  | 0.748690  | -0.270626 | 3.013067  |
| 28 | 6  | 1.564334  | -2.452218 | -0.644584 |
| 29 | 6  | 1.851321  | -3.791764 | -1.059521 |
| 30 | 1  | 0.034100  | 1.666226  | -4.534894 |
| 31 | 6  | 0.810888  | -4.738514 | -1.151105 |
| 32 | 6  | -0.521616 | -4.334109 | -0.816227 |
| 33 | 6  | -0.748334 | -2.993825 | -0.436760 |
| 34 | 6  | 2.580343  | -1.410161 | -0.438682 |
| 35 | 6  | 2.947215  | 0.875438  | 0.147215  |
| 36 | 6  | 4.345816  | 0.729379  | 0.028592  |
| 37 | 6  | 4.881007  | -0.552777 | -0.317366 |
| 38 | 6  | 3.990955  | -1.620436 | -0.554233 |
| 39 | 1  | 0.109325  | -0.214039 | -2.792092 |
| 40 | 1  | -4.375499 | 0.194473  | 2.724903  |
| 41 | 1  | -5.958993 | 0.229972  | 0.777449  |
| 42 | 1  | -4.994694 | 0.188169  | -1.590749 |
| 43 | 1  | -2.471881 | 0.046571  | -1.865768 |
| 44 | 1  | -2.873269 | 0.325495  | 4.269540  |
| 45 | 1  | -1.019063 | 0.092163  | 5.945213  |
| 46 | 1  | 1.356851  | -0.334582 | 5.095796  |
| 47 | 1  | 1.748174  | -0.423843 | 2.606700  |
| 48 | 1  | 2.873757  | -4.076904 | -1.308596 |
| 49 | 1  | 1.019854  | -5.761314 | -1.470496 |
| 50 | 1  | -1.356142 | -5.034617 | -0.857990 |
| 51 | 1  | -1.747852 | -2.634331 | -0.193234 |
| 52 | 1  | 2.471584  | 1.825912  | 0.387317  |
| 53 | 1  | 4.994360  | 1.591676  | 0.185514  |
| 54 | 1  | 5.958982  | -0.701920 | -0.405260 |
| 55 | 1  | 4.375745  | -2.604597 | -0.822882 |

10

11

E = -418.6811208 a.u.

|    |   |           |           |           |
|----|---|-----------|-----------|-----------|
| 1  | 6 | -0.573338 | 0.809164  | -0.000131 |
| 2  | 6 | -0.605778 | -0.661749 | 0.000026  |
| 3  | 6 | 0.536161  | -1.381004 | -0.000002 |
| 4  | 8 | 1.763885  | -0.782158 | -0.000014 |
| 5  | 6 | 1.837890  | 0.557893  | -0.000005 |
| 6  | 6 | 0.758821  | 1.370826  | 0.000039  |
| 7  | 8 | -1.640051 | 1.427290  | 0.000011  |
| 8  | 8 | -1.827983 | -1.218990 | 0.000045  |
| 9  | 1 | 0.603596  | -2.458807 | -0.000053 |
| 10 | 1 | -2.444458 | -0.460299 | -0.000085 |
| 11 | 1 | 2.866871  | 0.892900  | 0.000072  |
| 12 | 1 | 0.884647  | 2.446292  | 0.000167  |

12

E = -1496.9830695 a.u.

|    |    |           |           |           |
|----|----|-----------|-----------|-----------|
| 1  | 8  | 2.546167  | 4.316514  | -0.513059 |
| 2  | 6  | 2.365369  | 3.107504  | -1.121488 |
| 3  | 6  | 1.512521  | 2.163793  | -0.614762 |
| 4  | 6  | 0.789618  | 2.486946  | 0.612184  |
| 5  | 6  | 1.014156  | 3.759029  | 1.202612  |
| 6  | 6  | 1.888070  | 4.613526  | 0.604430  |
| 7  | 1  | 2.956337  | 3.003446  | -2.017638 |
| 8  | 8  | 1.271257  | 0.989242  | -1.112519 |
| 9  | 8  | 0.009920  | 1.591799  | 1.048778  |
| 10 | 13 | -0.001353 | -0.000482 | -0.128519 |
| 11 | 1  | 0.502045  | 4.043666  | 2.111931  |
| 12 | 1  | 2.133190  | 5.601989  | 0.967544  |
| 13 | 8  | 2.473505  | -4.358799 | -0.513898 |
| 14 | 6  | 1.516324  | -3.599255 | -1.123309 |
| 15 | 6  | 1.120507  | -2.391067 | -0.615051 |
| 16 | 6  | 1.757910  | -1.927009 | 0.614144  |
| 17 | 6  | 2.748164  | -2.755785 | 1.205459  |
| 18 | 6  | 3.055916  | -3.937935 | 0.605854  |
| 19 | 1  | 1.134156  | -4.058448 | -2.021224 |
| 20 | 8  | 0.222732  | -1.596551 | -1.113309 |
| 21 | 8  | 1.368593  | -0.805857 | 1.051795  |
| 22 | 1  | 3.247776  | -2.454783 | 2.116456  |
| 23 | 1  | 3.790418  | -4.643151 | 0.969393  |
| 24 | 8  | -5.013606 | 0.042259  | -0.514008 |
| 25 | 6  | -3.876526 | 0.490215  | -1.123149 |
| 26 | 6  | -2.632558 | 0.226034  | -0.615576 |
| 27 | 6  | -2.550496 | -0.559215 | 0.612760  |
| 28 | 6  | -3.763910 | -1.001200 | 1.203758  |
| 29 | 6  | -4.941176 | -0.673997 | 0.604922  |
| 30 | 1  | -4.082343 | 1.052398  | -2.020220 |
| 31 | 8  | -1.495076 | 0.605280  | -1.113346 |
| 32 | 8  | -1.385245 | -0.784725 | 1.050217  |
| 33 | 1  | -3.753797 | -1.585371 | 2.114127  |
| 34 | 1  | -5.919505 | -0.956283 | 0.968453  |

11

13

E = -1106.1565723 a.u.

|    |    |           |           |           |
|----|----|-----------|-----------|-----------|
| 1  | 6  | -0.791923 | -0.015169 | 0.000848  |
| 2  | 6  | -1.628271 | 0.955523  | 0.572631  |
| 3  | 6  | -3.005642 | 0.767527  | 0.612905  |
| 4  | 6  | -3.575290 | -0.385576 | 0.075568  |
| 5  | 6  | -2.756174 | -1.349400 | -0.507526 |
| 6  | 6  | -1.377442 | -1.164236 | -0.550466 |
| 7  | 6  | 0.683947  | 0.149923  | -0.010788 |
| 8  | 6  | 1.490742  | -0.875485 | 0.313552  |
| 9  | 16 | 3.262013  | -0.866331 | 0.173940  |
| 10 | 16 | 1.244196  | 1.775362  | -0.493918 |
| 11 | 1  | -1.191440 | 1.849691  | 1.000297  |
| 12 | 1  | -3.635718 | 1.523347  | 1.068132  |
| 13 | 1  | -4.649697 | -0.527134 | 0.103564  |
| 14 | 1  | -3.191156 | -2.241946 | -0.943127 |
| 15 | 1  | -0.746695 | -1.900590 | -1.034232 |
| 16 | 1  | 1.050095  | -1.808896 | 0.640797  |
| 17 | 1  | 3.510738  | -1.561145 | 1.303186  |
| 18 | 1  | 2.514831  | 1.623542  | -0.059318 |

12

14a

E = -4459.2915663 a.u.

|    |    |           |           |           |
|----|----|-----------|-----------|-----------|
| 1  | 6  | 2.925866  | -3.825200 | -0.003936 |
| 2  | 6  | 3.107206  | -4.108806 | -1.396367 |
| 3  | 6  | 3.973019  | -5.153828 | -1.812906 |
| 4  | 6  | 4.678101  | -5.929971 | -0.851075 |
| 5  | 6  | 4.513112  | -5.649504 | 0.535433  |
| 6  | 6  | 3.648056  | -4.607710 | 0.957859  |
| 7  | 6  | 2.001425  | -2.734388 | 0.445586  |
| 8  | 6  | 1.371077  | -2.732731 | 1.692893  |
| 9  | 16 | 0.338385  | -1.393857 | 2.252058  |
| 10 | 16 | 1.749098  | -1.304593 | -0.639337 |
| 11 | 1  | 2.559305  | -3.526825 | -2.138548 |
| 12 | 1  | 4.092054  | -5.361385 | -2.879048 |
| 13 | 1  | 5.344570  | -6.733696 | -1.173576 |
| 14 | 1  | 5.061248  | -6.230843 | 1.281131  |
| 15 | 1  | 3.559886  | -4.382537 | 2.022194  |
| 16 | 1  | 1.499158  | -3.548344 | 2.406901  |
| 17 | 42 | -0.133193 | -0.016039 | 0.269757  |
| 18 | 6  | -4.957448 | -0.369911 | -0.465603 |
| 19 | 6  | -5.612415 | -0.966345 | 0.660420  |
| 20 | 6  | -7.028221 | -0.971918 | 0.750011  |
| 21 | 6  | -7.817073 | -0.372605 | -0.272518 |
| 22 | 6  | -7.175681 | 0.237864  | -1.387147 |
| 23 | 6  | -5.760044 | 0.242370  | -1.484826 |
| 24 | 6  | -3.464045 | -0.378265 | -0.589311 |
| 25 | 6  | -2.809255 | -0.366644 | -1.824327 |
| 26 | 16 | -1.036748 | -0.427590 | -1.979711 |
| 27 | 16 | -2.452854 | -0.491768 | 0.911691  |
| 28 | 1  | -5.016504 | -1.431678 | 1.446597  |
| 29 | 1  | -7.511234 | -1.440044 | 1.611098  |
| 30 | 1  | -8.907359 | -0.375258 | -0.199144 |
| 31 | 1  | -7.771746 | 0.715098  | -2.169053 |
| 32 | 1  | -5.280821 | 0.744396  | -2.327243 |
| 33 | 1  | -3.357493 | -0.410433 | -2.767316 |
| 34 | 6  | 2.282543  | 4.225767  | -0.036516 |
| 35 | 6  | 3.324088  | 4.040424  | -1.002475 |
| 36 | 6  | 4.188720  | 5.112978  | -1.344949 |
| 37 | 6  | 4.027205  | 6.389336  | -0.736988 |
| 38 | 6  | 2.988065  | 6.587189  | 0.216618  |
| 39 | 6  | 2.122111  | 5.518824  | 0.564355  |
| 40 | 6  | 1.375148  | 3.095483  | 0.344040  |
| 41 | 6  | 0.746730  | 3.007967  | 1.589642  |
| 42 | 16 | -0.405606 | 1.715008  | 2.001186  |
| 43 | 16 | 1.009474  | 1.819907  | -0.890334 |
| 44 | 1  | 3.462760  | 3.060666  | -1.461361 |
| 45 | 1  | 4.983555  | 4.950923  | -2.076985 |
| 46 | 1  | 4.693650  | 7.213701  | -1.002430 |
| 47 | 1  | 2.846965  | 7.567856  | 0.677941  |
| 48 | 1  | 1.308342  | 5.695326  | 1.270010  |
| 49 | 1  | 0.910019  | 3.750750  | 2.372720  |

13

**14b**

E = -4258.9882967 a.u.

|    |    |           |           |           |
|----|----|-----------|-----------|-----------|
| 1  | 6  | 2.782566  | -3.715036 | 0.015198  |
| 2  | 6  | 2.919642  | -4.024041 | -1.348194 |
| 3  | 6  | 3.745477  | -5.061210 | -1.770006 |
| 4  | 6  | 4.459628  | -5.818492 | -0.843451 |
| 5  | 6  | 4.342709  | -5.518888 | 0.513284  |
| 6  | 6  | 3.521328  | -4.479363 | 0.935908  |
| 7  | 6  | 1.895706  | -2.620790 | 0.466177  |
| 8  | 6  | 1.256969  | -2.636462 | 1.673077  |
| 9  | 16 | 0.314168  | -1.304727 | 2.222535  |
| 10 | 16 | 1.719015  | -1.198147 | -0.536075 |
| 11 | 1  | 2.361113  | -3.443049 | -2.071353 |
| 12 | 1  | 3.827259  | -5.280760 | -2.829576 |
| 13 | 1  | 5.103715  | -6.626681 | -1.173471 |
| 14 | 1  | 4.904794  | -6.088786 | 1.246290  |
| 15 | 1  | 3.467689  | -4.236196 | 1.990629  |
| 16 | 1  | 1.349519  | -3.476659 | 2.353194  |
| 17 | 23 | -0.139347 | -0.011891 | 0.290349  |
| 18 | 6  | -4.801648 | -0.313834 | -0.440932 |
| 19 | 6  | -5.473418 | -0.988188 | 0.592589  |
| 20 | 6  | -6.861172 | -0.974572 | 0.675348  |
| 21 | 6  | -7.620502 | -0.281220 | -0.266460 |
| 22 | 6  | -6.969552 | 0.405303  | -1.289668 |
| 23 | 6  | -5.580686 | 0.393530  | -1.372997 |
| 24 | 6  | -3.326931 | -0.346208 | -0.551929 |
| 25 | 6  | -2.683896 | -0.318416 | -1.756735 |
| 26 | 16 | -0.972570 | -0.457923 | -1.878899 |
| 27 | 16 | -2.355787 | -0.549120 | 0.888634  |
| 28 | 1  | -4.889561 | -1.525736 | 1.329381  |
| 29 | 1  | -7.352654 | -1.509582 | 1.481562  |
| 30 | 1  | -8.703076 | -0.267805 | -0.197777 |
| 31 | 1  | -7.544328 | 0.965183  | -2.020507 |
| 32 | 1  | -5.086956 | 0.960007  | -2.153838 |
| 33 | 1  | -3.234715 | -0.312834 | -2.691550 |
| 34 | 6  | 2.239924  | 4.060902  | -0.018546 |
| 35 | 6  | 3.306970  | 3.844550  | -0.905987 |
| 36 | 6  | 4.183067  | 4.872804  | -1.238800 |
| 37 | 6  | 4.018200  | 6.146196  | -0.697123 |
| 38 | 6  | 2.958389  | 6.380513  | 0.178082  |
| 39 | 6  | 2.079253  | 5.354728  | 0.508160  |
| 40 | 6  | 1.314282  | 2.966679  | 0.346379  |
| 41 | 6  | 0.701629  | 2.891662  | 1.564641  |
| 42 | 16 | -0.454455 | 1.669782  | 1.929193  |
| 43 | 16 | 0.903874  | 1.762807  | -0.853202 |
| 44 | 1  | 3.443872  | 2.854731  | -1.323116 |
| 45 | 1  | 5.002331  | 4.675274  | -1.922443 |
| 46 | 1  | 4.701876  | 6.947104  | -0.958064 |
| 47 | 1  | 2.806726  | 7.370790  | 0.595640  |
| 48 | 1  | 1.240141  | 5.559591  | 1.162774  |
| 49 | 1  | 0.891710  | 3.625281  | 2.341142  |

Visualization of the spatial magnetic properties (TSNMRS) of **5a** as ICSS of different direction and size (blue represents 5 ppm shielding, cyan 2 ppm shielding, greenblue 1 ppm shielding, green 0.5 ppm shielding, yellow 0.1 ppm shielding and red  $-0.1$  ppm deshielding)

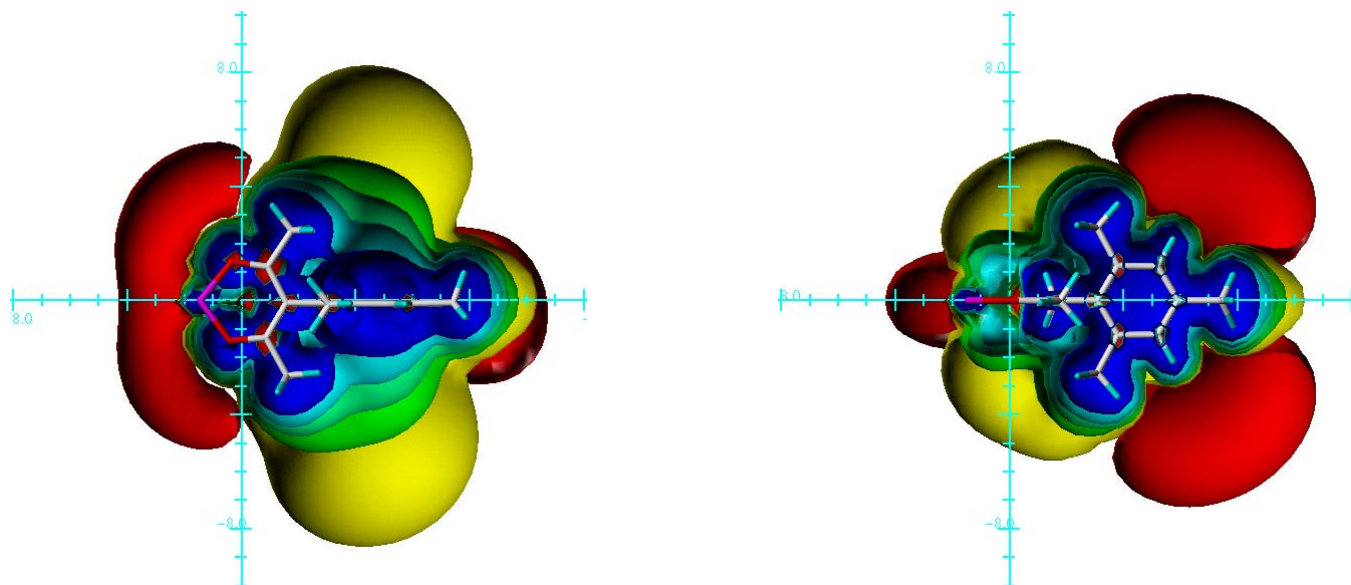

Visualization of the spatial magnetic properties (TSNMRS) of **5b** as ICSS of different direction and size (blue represents 5 ppm shielding, cyan 2 ppm shielding, greenblue 1 ppm shielding, green 0.5 ppm shielding, yellow 0.1 ppm shielding and red  $-0.1$  ppm deshielding)

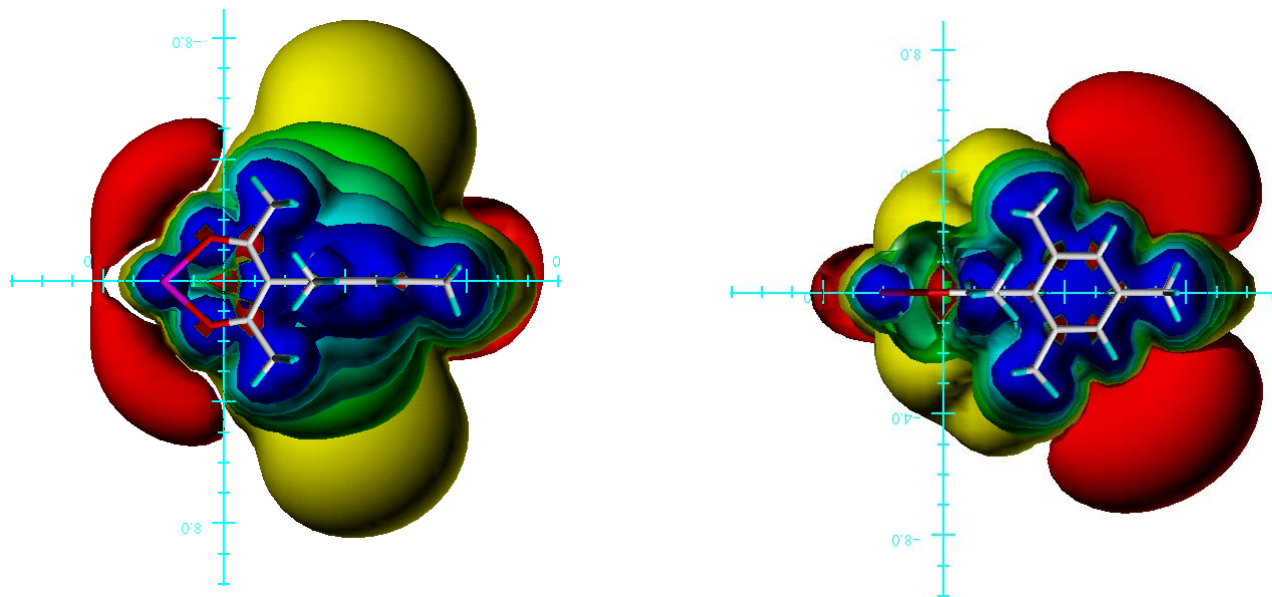

Visualization of the spatial magnetic properties (TSNMRS) of **6** as ICSS of different direction and size (blue represents 5 ppm shielding, cyan 2 ppm shielding, greenblue 1 ppm shielding, green 0.5 ppm shielding, yellow 0.1 ppm shielding and red  $-0.1$  ppm deshielding)

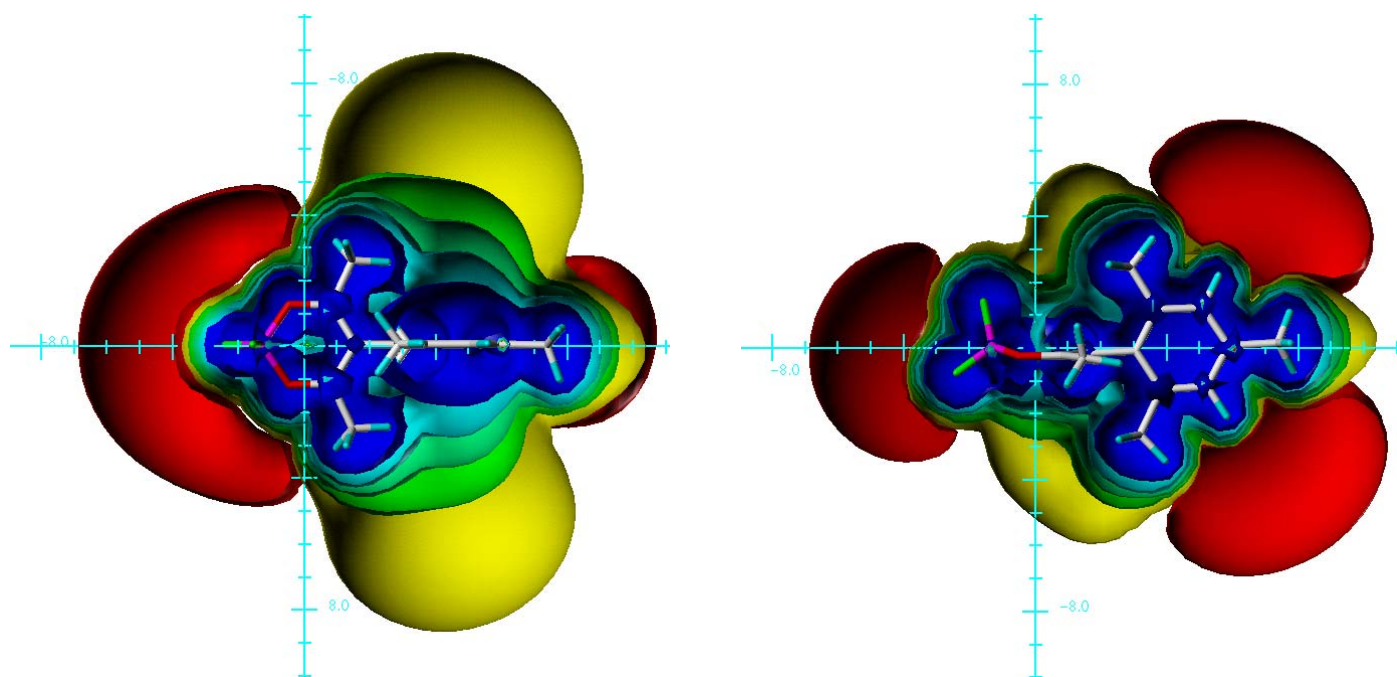

Supplement: c1cp21942a.pdf [file c1cp21942a.pdf]
